# Supplementary material for: Dynamic Zinc Accumulation and Contributions of Pre- and/or Post-Silking Zinc Uptake to Grain Zinc of Maize as Affected by Nitrogen Supply
Source: PubMed Central journal article supplement (PMC6785940; doi:10.3389/fpls.2019.01203), 2019-10-03
Supplement: Image_1.pdf [file Image_1.pdf]

## SUPPLEMENTARY MATERIALS

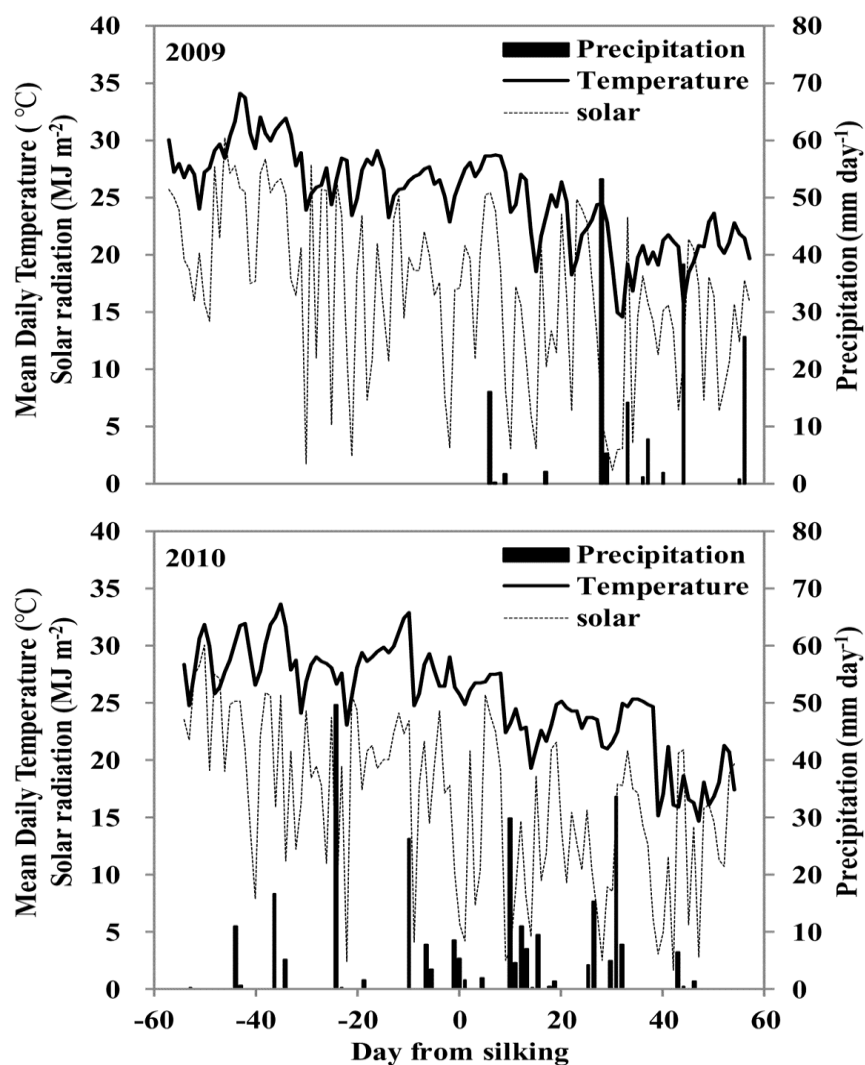

**FIGURE S1.** Daily mean temperature, solar radiation and precipitation during the maize growing seasons in 2009 and 2010 at Quzhou (QZ) County (36.9° N, 115.0° E), Hebei province, China.

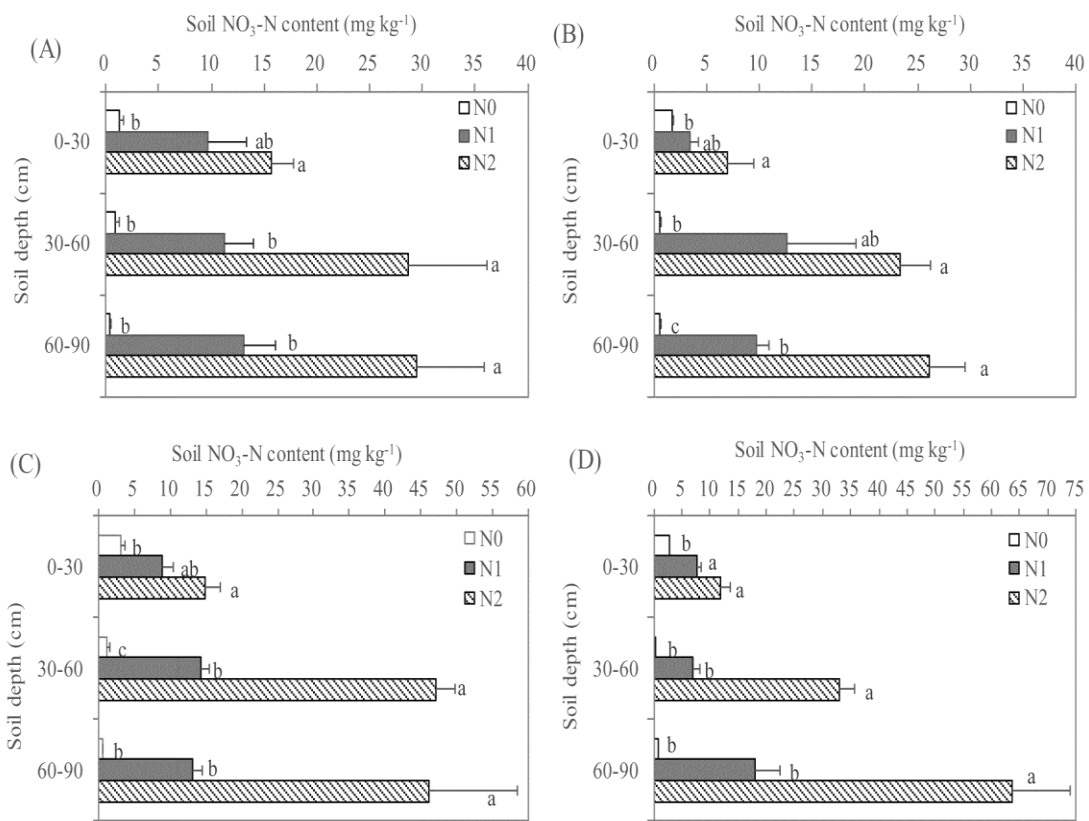

**FIGURE S2. The NO<sub>3</sub><sup>-</sup>-N contents at different soil layers (0-30, 30-60 and 60-90 cm) at R1 and R6 growth stages, respectively, in 2009 (A, C) and 2010 (B, D)**

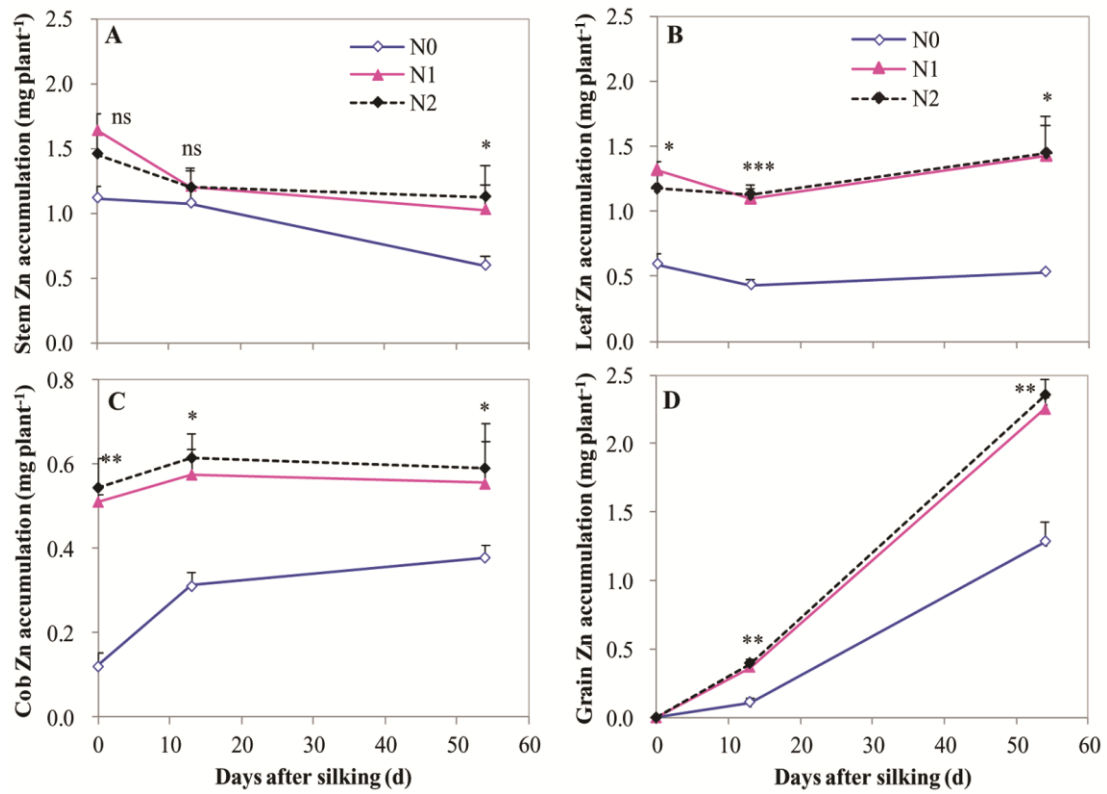

**FIGURE S3. Zn accumulation in maize shoot parts including stems (A), leaves (B), cobs (C) and grains (D) at R1, R3 and R6 stages as affected by different N treatments in 2010. The bars represent the standard error of the mean ( $n = 3$ ).**

**TABLE S1 N target value, soil nitrate-N content in the root layers, and N application rates for different growth stages and years.**

| Growth stage  | N target value<br>(kg ha <sup>-1</sup> ) | Soil nitrate-N (kg ha <sup>-1</sup> ) |          | N application rate (kg ha <sup>-1</sup> ) |      |
|---------------|------------------------------------------|---------------------------------------|----------|-------------------------------------------|------|
|               |                                          | 2009                                  | 2010     | 2009                                      | 2010 |
| Before sowing | –                                        | 23.5*                                 | 43.0*    | 45                                        | 45   |
| 6-leaf stage  | 120                                      | 119.5**                               | 109.8**  | 30                                        | 30   |
| 10-leaf stage | 190                                      | 118.9**                               | 173.1*** | 75                                        | 30   |

\* Soil nitrate-N content in the top 30 cm before sowing

\*\* Soil nitrate-N content in the top 60 cm at the 6-leaf stage

\*\*\* Soil nitrate-N content in the top 90 cm at the 10-leaf stage

**TABLE S2 Percentage of grain Zn at maturity provided by remobilization of pre-silking Zn stores in vegetative tissues (leaves, stems and cob) and post-silking Zn uptake as affected by different N application rates (N0: zero N application; N1: 105 kg N ha<sup>-1</sup>; N2: 250 kg N ha<sup>-1</sup>) in 2010.**

| Parameter                            | N treatment |      |       |
|--------------------------------------|-------------|------|-------|
|                                      | N0          | N1   | N2    |
| Remobilization of pre-silking Zn (%) |             |      |       |
| Leaves                               | 4.8         | -4.8 | -11.1 |
| Stems                                | 40.6        | 27.3 | 14.2  |
| Cob                                  | -20.0       | -1.9 | -2.0  |
| Straw                                | 25.5        | 20.5 | 1.2   |
| Post-silking shoot Zn uptake (%)     | 74.5        | 79.5 | 98.8  |
